# Supplementary material for: Protein-observed 19F NMR of LecA from Pseudomonas aeruginosa
Source: PubMed Central journal article supplement (PMC7874386; doi:10.1093/glycob/cwaa057), 2020-07-01
Supplement: supplementary_information_revised_cwaa057.pdf [file supplementary_information_revised_cwaa057.pdf]

## Supplementary data

### Protein-observed <sup>19</sup>F NMR of LecA from *Pseudomonas aeruginosa*

Elena V. Shanina<sup>1,2</sup>, Eike Siebs<sup>3,4,5</sup>, Hengxi Zhang<sup>1,2</sup>, Daniel Varón Silva<sup>1,2</sup>, Ines Joachim<sup>3,4,5</sup>, Alexander Titz<sup>3,4,5</sup> & Christoph Rademacher<sup>1,2,\*</sup>

<sup>1</sup> Max Planck Institute of Colloids and Interfaces, Department of Biomolecular Systems, Am Mühlenberg 14424, Potsdam, Germany;

<sup>2</sup> Free University of Berlin, Department of Biochemistry and Chemistry, 14195 Berlin, Germany;

<sup>3</sup> Chemical Biology of Carbohydrates (CBCH), Helmholtz Institute for Pharmaceutical Research Saarland (HIPS), Helmholtz Centre for Infection Research, 66123 Saarbrücken, Germany;

<sup>4</sup> Saarland University, Department of Pharmacy, 66123 Saarbrücken, Germany;

<sup>5</sup> German Center for Infection Research (DZIF), Hannover-Braunschweig, Germany.

## Table of contents

### Supplementary materials and methods

*Site-directed mutagenesis*

*Liquid chromatography–mass spectrometry (LC–MS)*

*Materials*

### Supplementary tables

**Table SI.** Line width values of four tryptophan residues measured in PrOF NMR upon variation of buffer, temperature or protein concentration.

**Table SII.** Primer sequences used for single-point mutagenesis.

**Table SIII.** List of components used to prepare minimal medium (M9) supplemented with an amino acid cocktail and 5-fluoroindole (5FI).

**Table SIV. PrOF NMR and FP assay affinity values**

**Supplementary figures**

**Fig. S1.** Temperature optimization for 5FW LecA PrOF NMR.

**Fig. S2.** Optimization of 5FW LecA concentration for PrOF NMR.

**Fig. S3.** Buffer optimization of 5FW LecA for PrOF NMR.

**Fig. S4.** PrOF NMR titration of  $\text{Ca}^{2+}$  to apo 5FW LecA.

**Fig. S5.** PrOF NMR titration of D-Gal to holo 5FW LecA.

**Fig. S6.** ITC titration of  $\text{Ca}^{2+}$  to apo LecA.

**Fig. S7.** Competitive binding assay based on fluorescence polarization with LecA and 5FW LecA.

**Fig. S8.** PrOF NMR titration of Ph- $\beta$ -D-Gal to holo 5FW LecA.

## Supplementary materials and methods

### *Materials*

All chemicals and buffers used within this work were purchased from Sigma Aldrich (St. Louis, MO, USA) or Carl Roth (Karlsruhe, Germany) unless otherwise indicated.

The LecA-encoding gene from *P. aeruginosa* PAO1 cloned into pET25(b+) vector resulted in pET25pa1l plasmid and LecA was produced recombinantly as reported previously (Blanchard, et al. 2008).

### *Site-directed mutagenesis*

To distinguish fluorine resonances, we mutated tryptophan (W) against phenylalanine (F) using Quick-Change Lightning Mutagenesis Kit (Agilent, Santa Clara, USA). We used primers shown in (**Table SII**) following the manufacturer's protocol to generate mutants W33F, W42F and W84F. The plasmids were sequenced to confirm the mutagenesis using primers for T7 promoter. The plasmid for W2F mutant was obtained from GenScript Biotech (USA).

### *Liquid chromatography-mass spectrometry (LC-MS)*

LC-MS analysis of LecA was performed using an ESI Waters Xevo G2-XS mass spectrometer coupled to an Acquity H-class UPLC system. LC separation was done on an Acquity UPLC Protein BEH C4 column (21 x 50 mm, 1.7  $\mu$ m) using a gradient from 10 to 70% of acetonitrile in water with 0.5% formic acid in 12 min. The MS analysis was performed in positive mode using a 1.5 kV capillary voltage. The data were analyzed using MassLynx 4.2 and Biopharmalynx 1.3 software.

## Supplementary tables

**Table SI.** Line width values of four tryptophan residues measured in PrOF NMR upon variation of buffer, temperature and protein concentration (*ND* = line width could not be determined due to low signal-to-noise quality of spectra).

| Peak | Line width [Hz] |               |             |           |       |                       |             |             |
|------|-----------------|---------------|-------------|-----------|-------|-----------------------|-------------|-------------|
|      | Buffer          |               | Temperature |           |       | Protein concentration |             |             |
|      | TBS<br>pH 7.8   | MES<br>pH 6.0 | 285 K       | 298 K     | 310 K | 50 $\mu$ M            | 100 $\mu$ M | 200 $\mu$ M |
| W42  | 180             | 148           | <i>ND</i>   | <i>ND</i> | 153   | <i>ND</i>             | 170         | 178         |
| W2   | 172             | 172           | <i>ND</i>   | 161       | 125   | <i>ND</i>             | 152         | 159         |
| W33  | 161             | 144           | <i>ND</i>   | 150       | 145   | <i>ND</i>             | 167         | 165         |
| W85  | 115             | 113           | <i>ND</i>   | 127       | 116   | <i>ND</i>             | 109         | 109         |

**Table SII.** Primer sequences used for single-point mutagenesis (F = forward, R = reverse).

| Primer        | Sequence                        |
|---------------|---------------------------------|
| LecA W33F F   | CGTAACTGGCGAAACCGGCGGCGACGA     |
| LecA W33F R   | TCGTCCCGCCGGTTTCGCCAGTTACGGA    |
| LecA W42F F   | CCTGCGGCCCGAATTTCTGGGTAGGTCCGTA |
| LecA W42F R   | TACGGACCTACCCAGAAATTCGGGCCGCAGG |
| LecA W84F F   | ATTGGGTGCAACGAAACGGAACAACC      |
| LecA W84F R   | GGTTGTTCCGTTTCGTTGCACCCAAT      |
| T7 PROMOTOR   | TAATACGACTCACTATATAGG           |
| T7 TERMINATOR | GCTAGTTATTGCTCAGCGG             |

**Table SIII.** List of components used to prepare minimal medium (M9) supplemented with an amino acid cocktail and 5-fluoroindole (5FI).

| <b>Component</b>                                                                                                   | <b>Amount per 1 L expression</b> |
|--------------------------------------------------------------------------------------------------------------------|----------------------------------|
| Autoclaved MiliQ water                                                                                             | 500 mL                           |
| 5x Amino acid cocktail                                                                                             | 250 mL                           |
| 10x M9 salts                                                                                                       | 100 mL                           |
| 20% D-glucose                                                                                                      | 20 mL                            |
| 100x Trace elements                                                                                                | 10 mL                            |
| 100 mg mL <sup>-1</sup> Ampicillin                                                                                 | 1 mL                             |
| 1 mg mL <sup>-1</sup> Vitamins                                                                                     | 1 mL                             |
| 1 M CaCl <sub>2</sub>                                                                                              | 300 µL                           |
| 1 M MgSO <sub>4</sub>                                                                                              | 4 mL                             |
| Prepare 5-fluoroindole (60mg) in 250 µL DMSO                                                                       |                                  |
| <b>Amino acids cocktail (5x)</b>                                                                                   |                                  |
| * For 1 L of stock solution, dissolve one by one in 50 mL of distilled MiliQ water and combine in following order: |                                  |
| <b>Component</b>                                                                                                   |                                  |
| Alanine                                                                                                            | 500 mg                           |
| Arginine                                                                                                           | 400 mg                           |
| Asparagine Monohydrate                                                                                             | 400 mg                           |
| Aspartic acid                                                                                                      | 400 mg                           |
| Cysteine-HCl-H <sub>2</sub> O                                                                                      | 50 mg                            |
| Glutamine                                                                                                          | 400 mg                           |
| Glutamic acid                                                                                                      | 650 mg                           |
| Glycine                                                                                                            | 550 mg                           |
| Histidine                                                                                                          | 100 mg                           |
| Isoleucine                                                                                                         | 230 mg                           |
| Leucine                                                                                                            | 230 mg                           |
| Lysine-HCl                                                                                                         | 420 mg                           |
| Methionine                                                                                                         | 250 mg                           |
| Phenylalanine                                                                                                      | 130 mg                           |
| Proline                                                                                                            | 100 mg                           |
| Serine                                                                                                             | 2.1 g                            |
| Threonine                                                                                                          | 230 mg                           |
| Tyrosine                                                                                                           | 170 mg                           |
| Valine                                                                                                             | 230 mg                           |
| Sodium acetate                                                                                                     | 1.5 g                            |
| Succinic acid                                                                                                      | 1.5 g                            |
| Potassium phosphate (dibasic)                                                                                      | 10.5 g                           |
| Adenine                                                                                                            | 500 mg                           |
| Guanosine                                                                                                          | 650 mg                           |
| Thymine                                                                                                            | 200 mg                           |
| Uracil                                                                                                             | 500 mg                           |
| Cytosine                                                                                                           | 200 mg                           |

---

**M9 salt solution (10x)**

---

\* For 1 L stock solution, dissolve in 800 mL, adjust the pH to 7.2 with NaOH, autoclave for 15 min at 121°C. Use non-<sup>15</sup>N labeled NH<sub>4</sub>Cl.

|                                                     |        |
|-----------------------------------------------------|--------|
| Na <sub>2</sub> HPO <sub>4</sub> -2H <sub>2</sub> O | 75.2 g |
| KH <sub>2</sub> PO <sub>4</sub>                     | 30 g   |
| NaCl                                                | 5 g    |
| NH <sub>4</sub> Cl                                  | 5 g    |

---

**Trace elements (10x)**

---

\* For 1 L stock solution, sterilize the solution over a 0.22 µm filter. Store in dark.

|                                            |        |
|--------------------------------------------|--------|
| EDTA                                       | 5 g    |
| In 800 mL MQ, adjust pH to 7.5 with NaOH   |        |
| FeCl <sub>3</sub> (anhydrous)              | 498 mg |
| ZnCl <sub>2</sub>                          | 84 mg  |
| 0.1 M CuCl <sub>2</sub> -2H <sub>2</sub> O | 765 µL |
| 0.2 M CoCl <sub>2</sub> -2H <sub>2</sub> O | 210 µL |
| 0.1 M H <sub>3</sub> BO <sub>3</sub>       | 1.6 mL |
| 1 M MnCl <sub>2</sub> -4H <sub>2</sub> O   | 8.1 µL |

---

**Vitamin stock (1000x)**

---

\* For 50 mL stock solution, sterilize the solution over a 0.22 µm filter. Prepare 1 mL aliquots and store at -20°C.

|             |       |
|-------------|-------|
| Biotin      | 50 mg |
| Thiamin-HCl | 50 mg |

---

**Table SIV.** PrOF NMR and FP assay affinity values. Competitive binding assay of Me- $\alpha$ -D-Gal, D-GalNAc and D-Gal with LecA and 5FW LecA based on fluorescence polarization are shown. IC<sub>50</sub> values are given as averages of three independent (LecA) or three technical replicates (5FW LecA) and is a relative affinity value depending on the concentration of ligand (8 mM) used in this assay, which was required to reduce binding of Me- $\alpha$ -D-Gal to half of the uninhibited value.  $K_d$  values for Me- $\alpha$ -D-Gal, D-GalNAc, D-Gal, Ph- $\beta$ -D-Gal and pNPGal are defined as half of binding sites of 100  $\mu$ M 5FW LecA being bound and are given as average of three independent replicates (*ND* = not determined).

|                     | Competitive binding assay           |                                         | PrOF NMR                     |
|---------------------|-------------------------------------|-----------------------------------------|------------------------------|
|                     | LecA<br>IC <sub>50</sub> [ $\mu$ M] | 5FW LecA<br>IC <sub>50</sub> [ $\mu$ M] | 5FW LecA<br>$K_d$ [ $\mu$ M] |
| Me- $\alpha$ -D-Gal | 140 $\pm$ 30                        | 195                                     | <i>ND</i>                    |
| D-Gal               | 330 $\pm$ 40                        | 317                                     | 360 $\pm$ 50                 |
| D-GalNAc            | 1230 $\pm$ 200                      | 1991                                    | 780 $\pm$ 97                 |
| Ph- $\beta$ -D-Gal  | <i>ND</i>                           | <i>ND</i>                               | 166 $\pm$ 42                 |
| pNPGal              | <i>ND</i>                           | <i>ND</i>                               | 54 $\pm$ 6                   |

## Supplementary figures

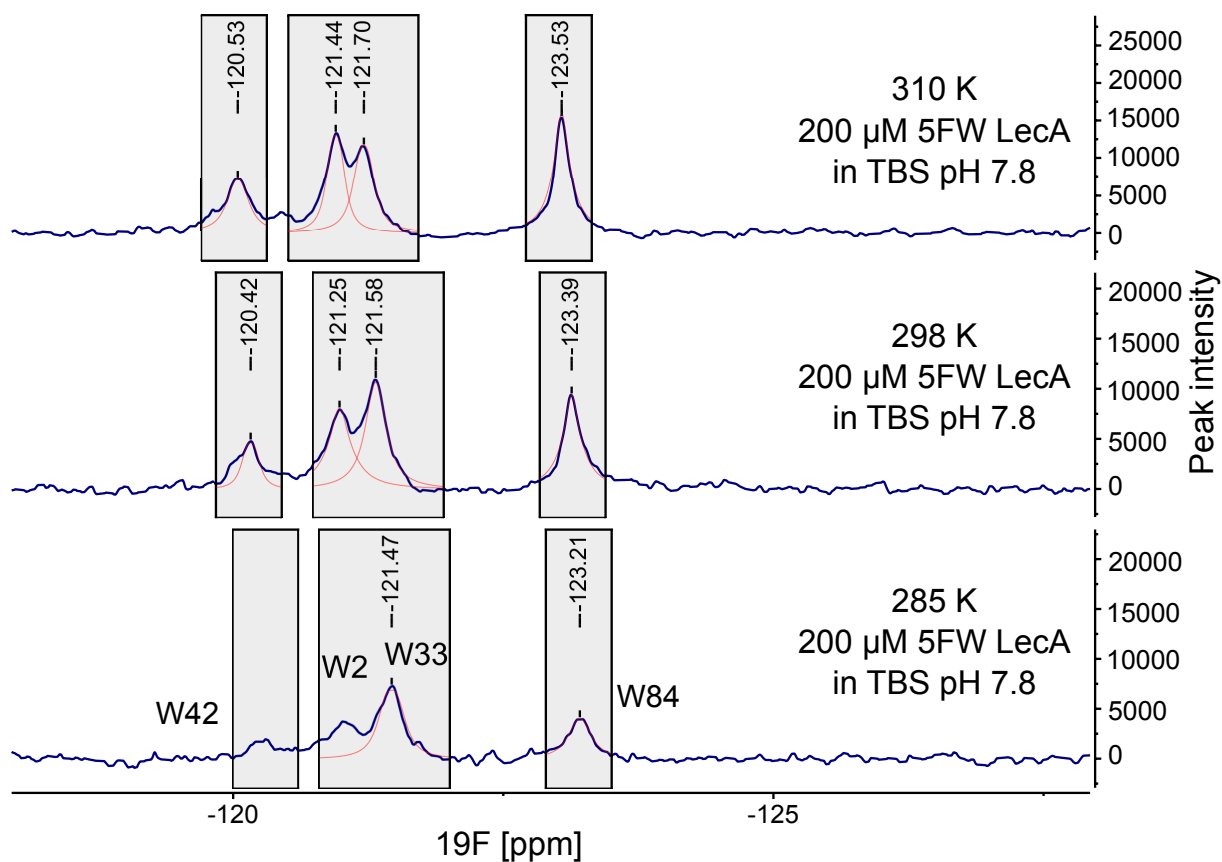

**Fig. S1.** Temperature optimization for 5FW LecA PrOF NMR. Shown is PrOF NMR spectrum of 200  $\mu$ M holo 5FW LecA in TBS pH 7.8 at temperatures 285 K, 298 K and 310 K. Peak line widths of tryptophan resonances were measured in MestReNova using Line Fitting function for manual fitting of peaks (*red line*). The line width values for W42 and W84 at different temperatures are shown in **Table SI**, PrOF NMR spectrum of 5FW LecA at 298 K and 310 K resulted in similarly well-resolved spectra. The line width values of W2 and W33 deviated between measurements due to the overlap of both signals. As result, we used 310 K for PrOF NMR experiments with 5FW LecA.



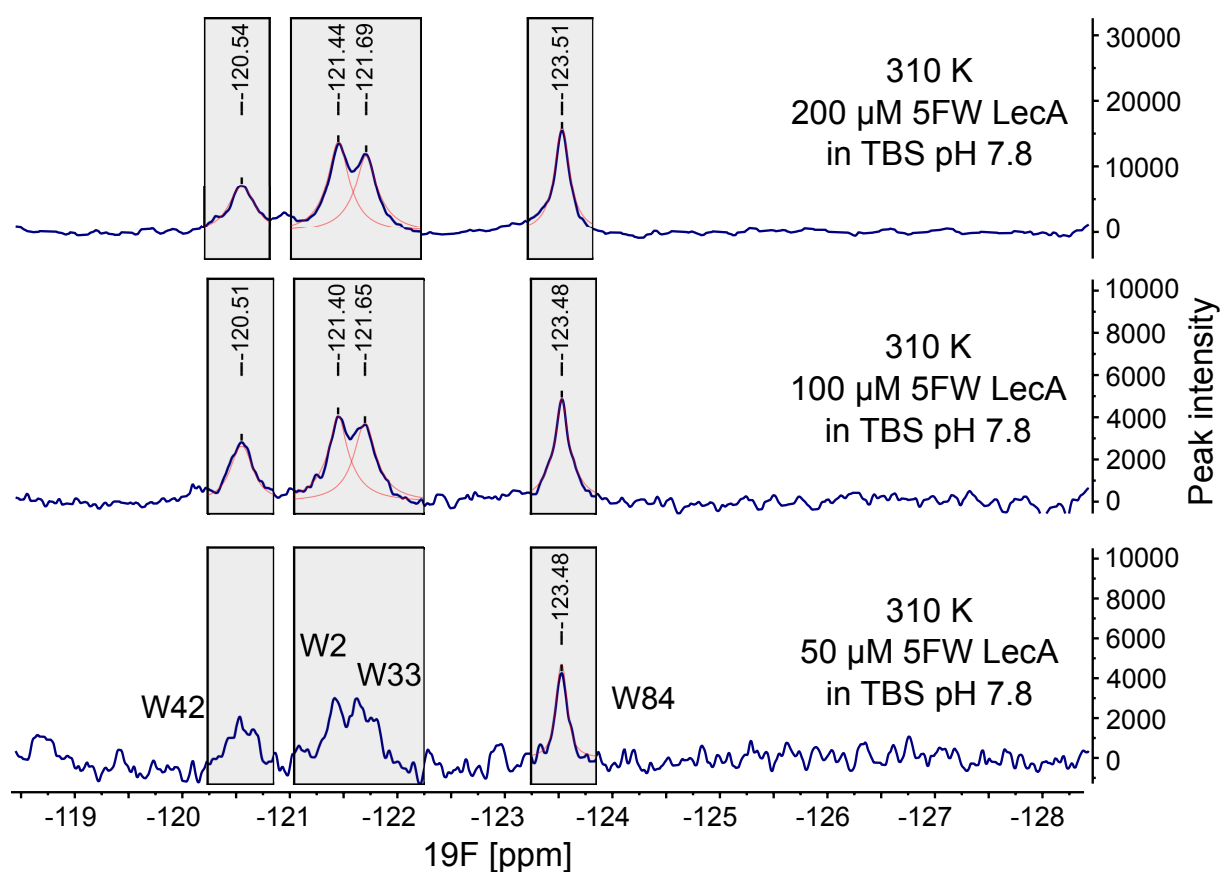

**Fig. S2.** Optimization of 5FW LecA concentration for PrOF NMR. Shown are PrOF NMR spectra of 50  $\mu\text{M}$  (*bottom*), 100  $\mu\text{M}$  (*middle*) and 200  $\mu\text{M}$  (*top*) holo 5FW LecA in TBS pH 7.8 buffer at 310 K. Peak line widths of tryptophan resonances were measured in MestReNova x64 using Line Fitting function for manual fitting of peaks (*red line*). The line width values for W42 and W84 at concentrations 100  $\mu\text{M}$  and 200  $\mu\text{M}$  of 5FW LecA are shown in **Table S1**. Since PrOF NMR spectrum containing 50  $\mu\text{M}$  5FW LecA resulted in a low signal-to-noise spectrum, we did not measure line widths of tryptophan resonances. As result, 100 – 200  $\mu\text{M}$  5FW LecA concentrations can be used in future experiments.

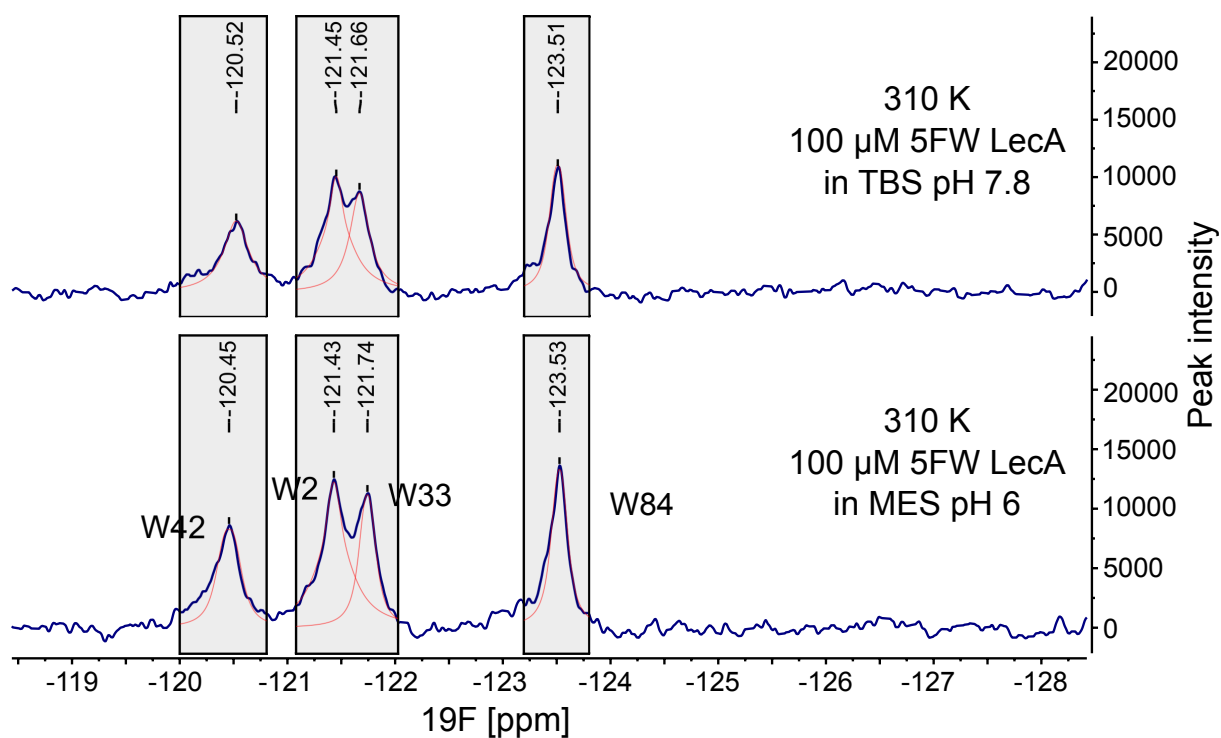

**Fig. S3.** Buffer optimization of 5FW LecA PrOF NMR. Shown is PrOF NMR spectrum of 100  $\mu$ M holo 5FW LecA in a buffer with low (MES pH 6.0, *bottom*) vs medium salt (TBS pH 7.8, *top*) concentration. Both buffer systems show a comparable result on resolution of fluorine resonances. Peak line width values of tryptophan resonances were measured in MestReNova x64 using Line Fitting function for manual fitting of peaks (*red line*). The line width values for W42 and W84 are shown in **Table SI**, whereas line widths of W2 and W33 deviated between measurements due to the overlap of both signals.

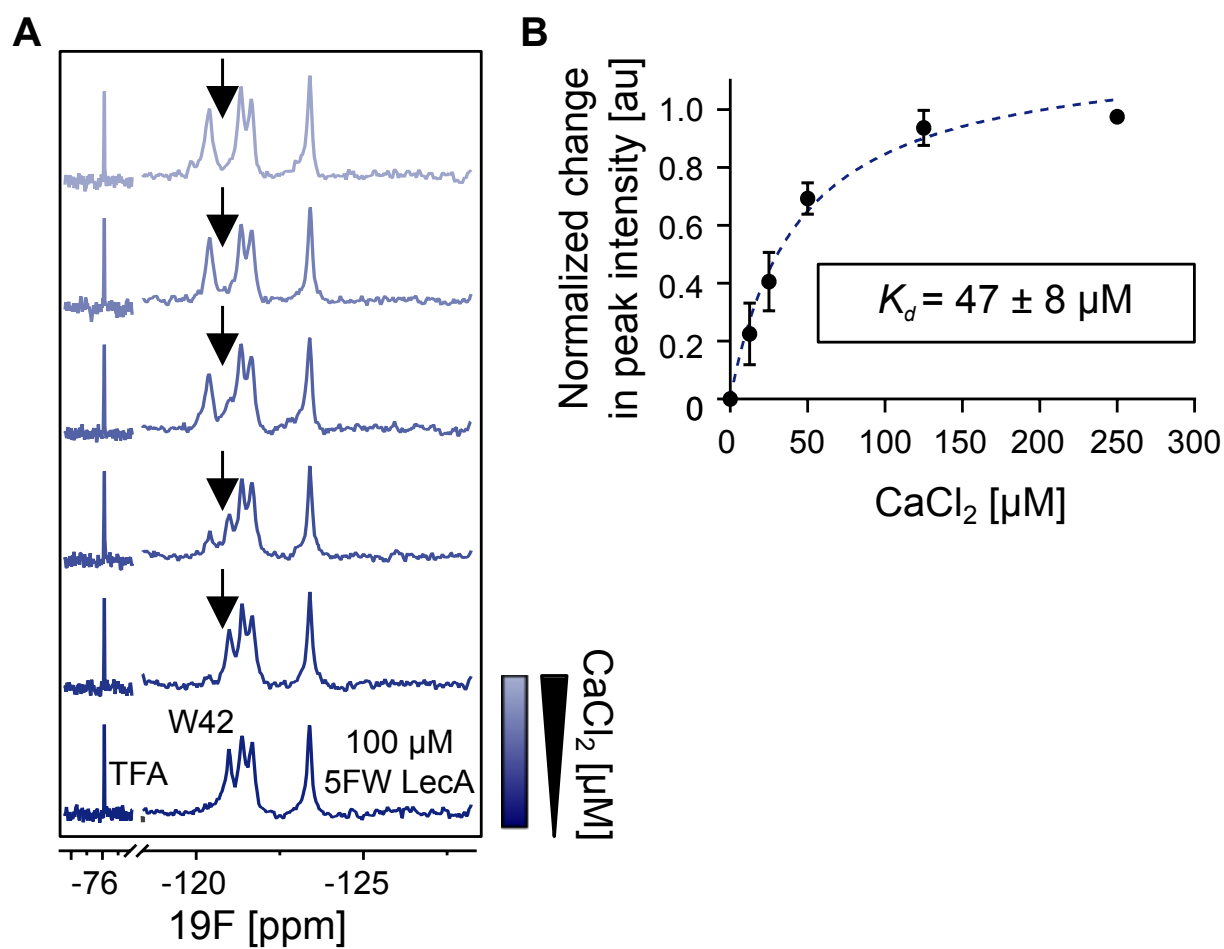

**Fig. S4.** PrOF NMR titration of  $\text{Ca}^{2+}$  to apo 5FW LecA. **A.** PrOF NMR titration of  $\text{Ca}^{2+}$  to  $\text{Ca}^{2+}$ -free (apo) 5FW LecA in MES pH 6 at 310 K. The W42 resonance undergoes a slow exchange on the chemical shift timescale and the signal intensity of  $\text{Ca}^{2+}$ -free W42 peak (arrow) can be followed to determine  $K_d$ . **B.** Shown is normalized change in unbound W42 peak intensity upon addition of  $\text{Ca}^{2+}$ . For this, the change in W42 peak intensity in presence of the  $\text{Ca}^{2+}$  compared to the reference was divided by W42 peak intensity of the reference spectrum delivering the normalized change in peak intensity values plotted on Y-axis. Titration data was fitted to one-site-binding model to obtain  $K_d$  value of  $47 \pm 8 \mu\text{M}$ . The error bars represent the standard deviation of three independent titrations.

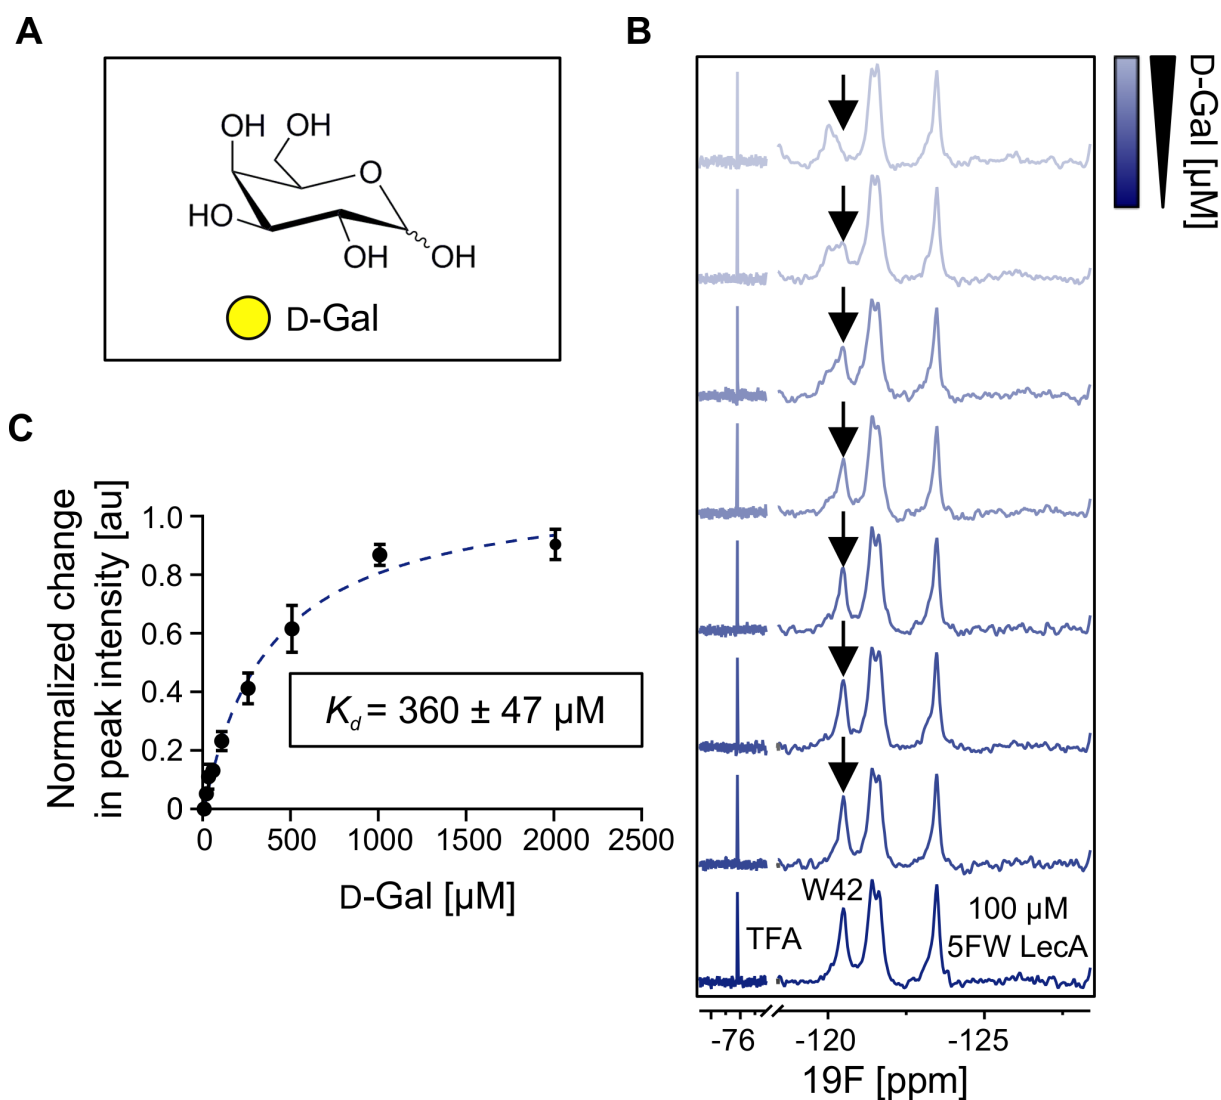

**Fig. S5.** PrOF NMR titration of D-Gal to holo 5FW LecA. **A.** The structure of D-Gal. **B.** PrOF NMR titration of D-Gal to holo 5FW LecA in TBS pH 7.8 at 310 K. The W42 resonance from free protein appeared with decreasing intensity (*arrow*) upon D-Gal addition and can be followed to determine  $K_d$ . **C.** Shown is normalized change in W42 peak intensity upon addition of D-Gal. For this, the change in W42 peak intensity in presence of the D-Gal was divided by W42 peak intensity of the reference spectrum delivering the normalized change in peak intensity values plotted on Y-axis. Titration data was fitted to one-site-binding model to obtain  $K_d$  value of  $360 \pm 47 \mu\text{M}$ . The error bars represent the standard deviation of three independent titrations.

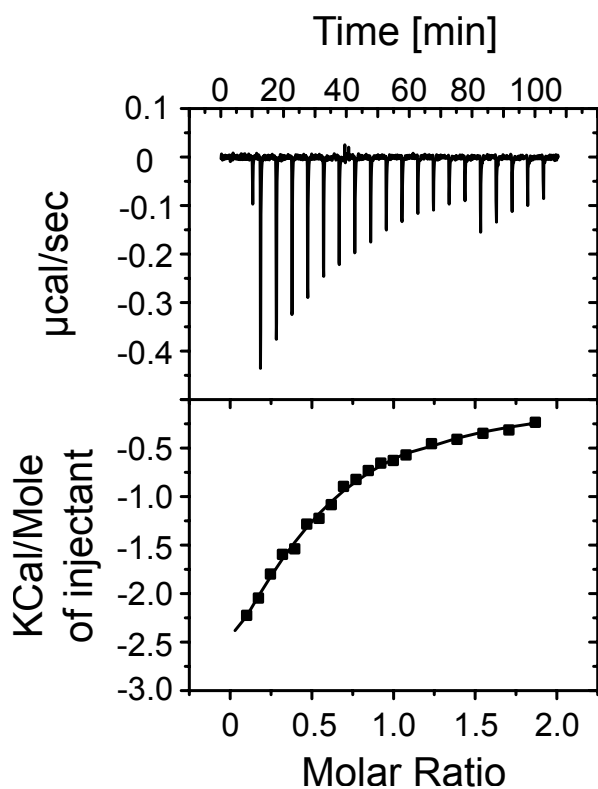

**Fig. S6.** ITC titration of  $\text{Ca}^{2+}$  to apo LecA. One representative graph of an isothermal titration microcalorimetry (ITC) of unlabeled LecA with  $\text{Ca}^{2+}$  is depicted. The  $K_d$  of  $60 \pm 20 \mu\text{M}$  was determined from a minimum of three independent titrations.

**A**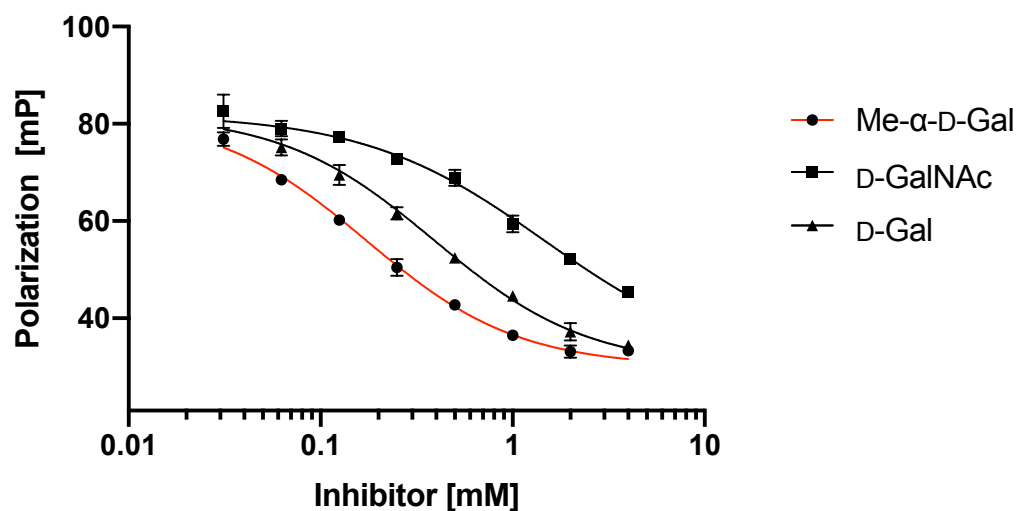**B**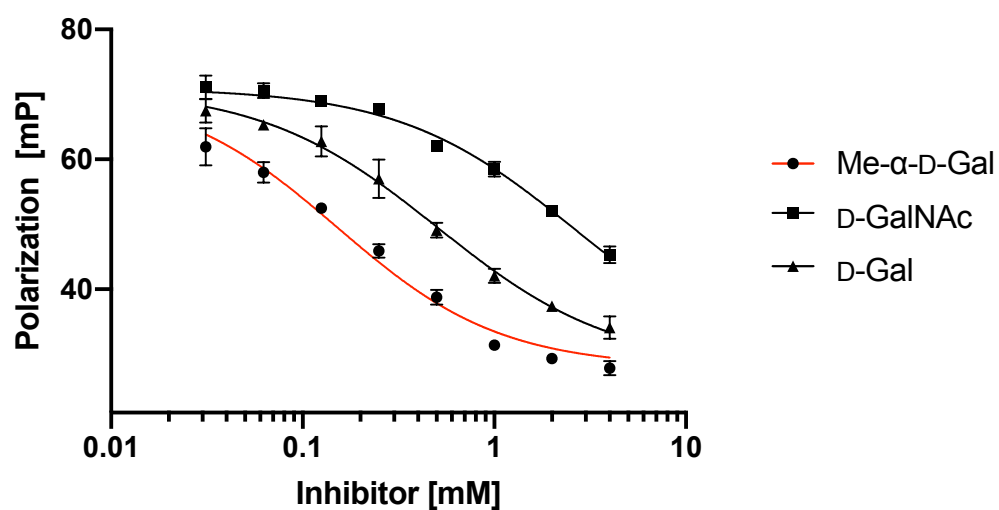

**Fig. S7.** Competitive binding assay based on fluorescence polarization with LecA and 5FW LecA. One representative titration of Me- $\alpha$ -D-Gal (positive control), D-GalNAc and D-Gal to **A.** LecA and **B.** 5FW LecA is depicted. IC<sub>50</sub> values are given in **Table I** as average of three independent (LecA) or three technical replicates (5FW LecA).

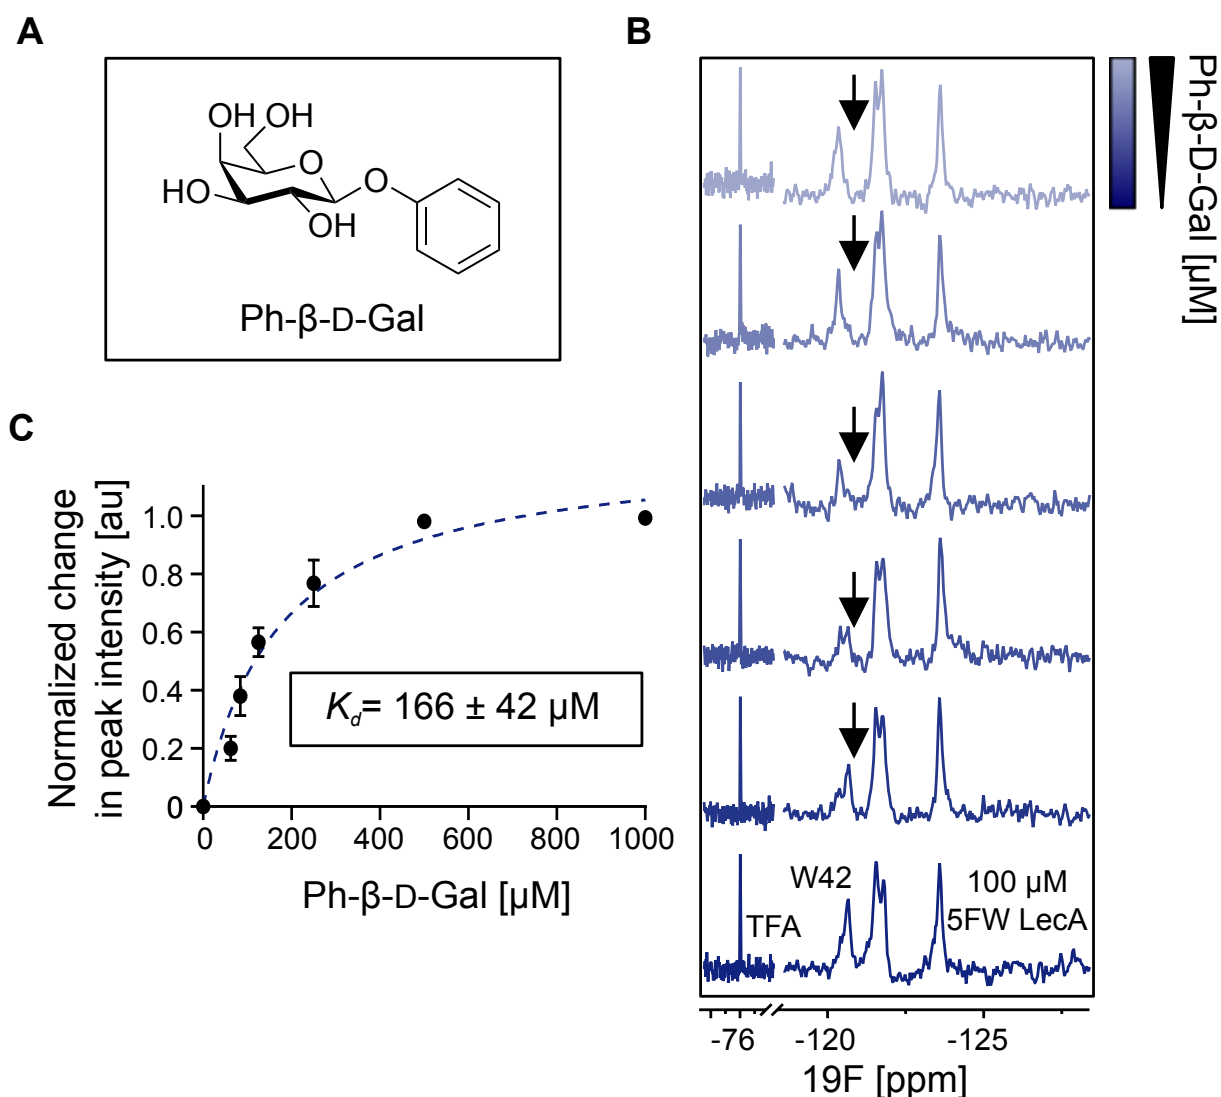

**Fig. S8.** PrOF NMR titration of Ph-β-D-Gal to holo 5FW LecA. **A.** The structure of Ph-β-D-Gal. **B.** The PrOF NMR titration of Ph-β-D-Gal to holo 5FW LecA in TBS pH 7.8 at 310 K. The W42 resonance from free protein appeared with decreasing intensity (*arrow*) upon Ph-β-D-Gal addition. The change in signal intensity of free W42 peak can be followed to determine  $K_d$  of 5FW LecA for Ph-β-D-Gal. **B.** Shown is normalized change in W42 peak intensity upon addition of Ph-β-D-Gal. For this, peak intensity in presence of Ph-β-D-Gal was divided by W42 peak intensity of the reference spectrum delivering the normalized change in peak intensity values plotted on Y-axis. Titration data was fitted to one-site-binding model to obtain  $K_d$  value of  $166 \pm 42 \mu\text{M}$ . The error bars represent the standard deviation of three independent titrations.
